# Supplementary material
Source: publisher figshare collection journal article supplement (https://karger.figshare.com/articles/dataset/_/5245279)

72h time-lapse of E15.5 urethral tissue

0hr

24hr

48hr

72hr

WT ♀  
DMSO

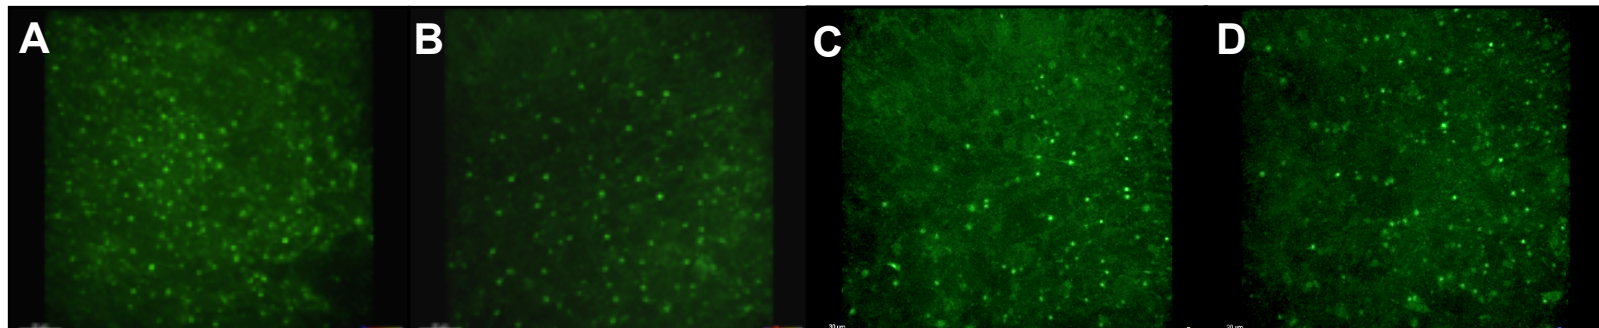

WT ♀  
DHT

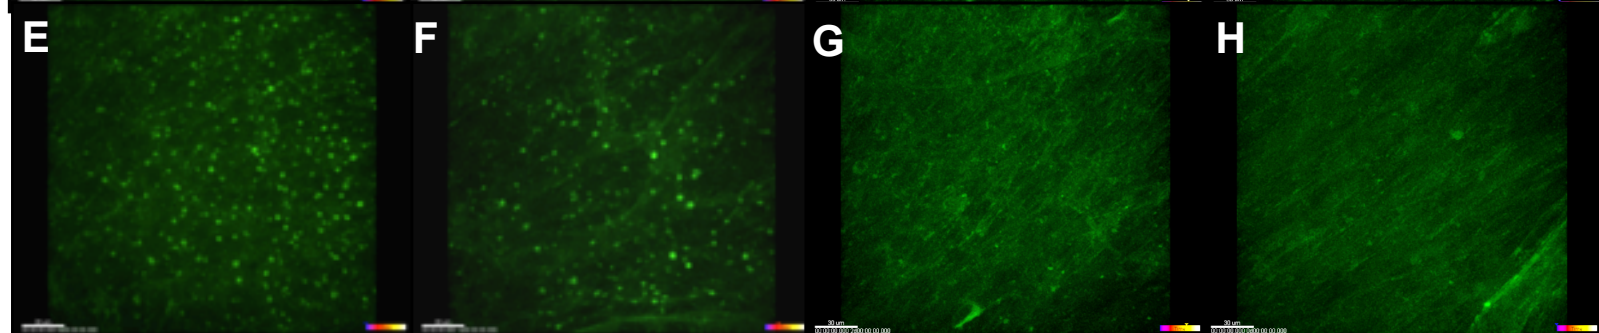

ARKO ♂  
DMSO

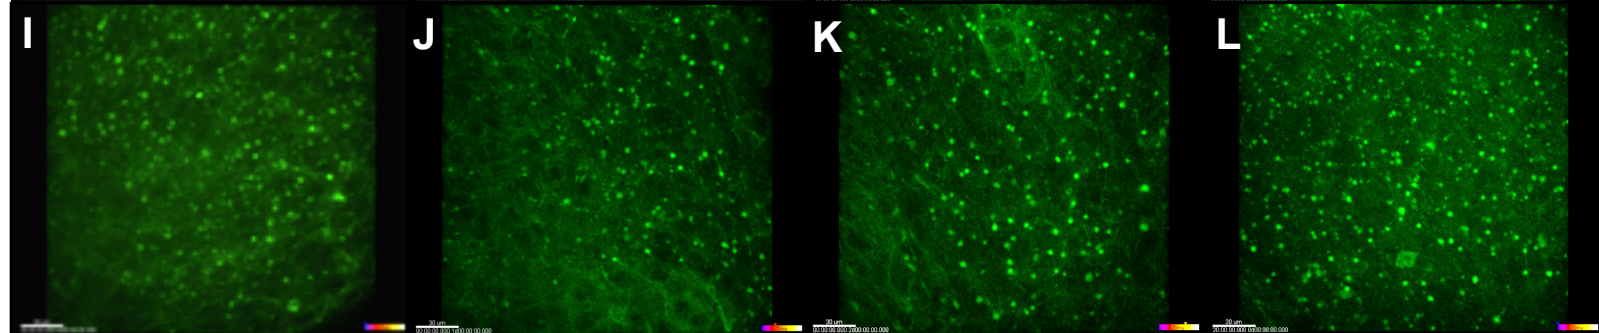

ARKO ♂  
DHT

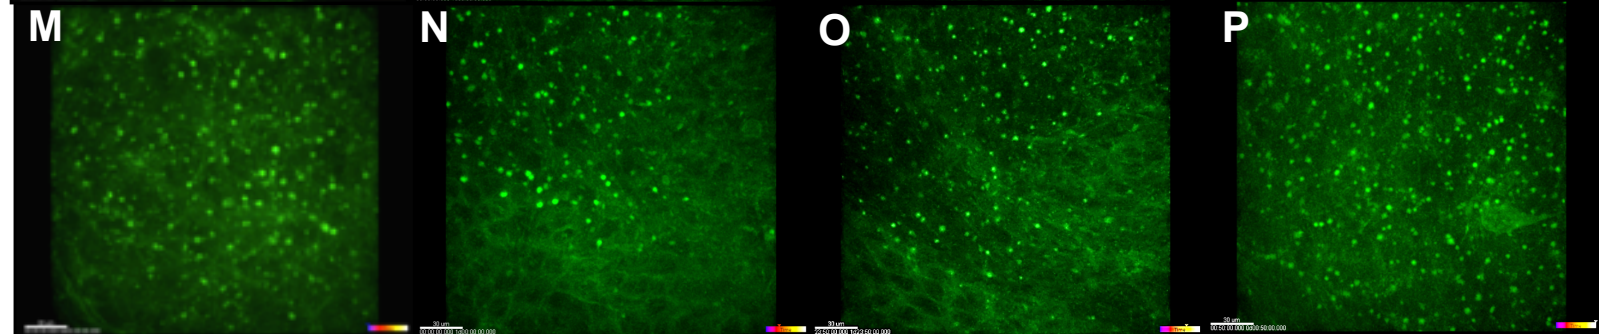

Supplement: Supplementary file 1 [file 1]

**Vimentin, F-actin, Nuclei**

♀

♂

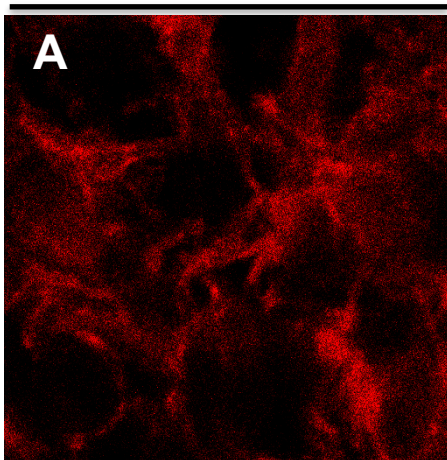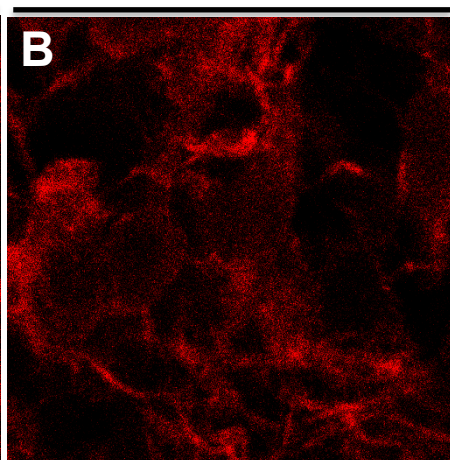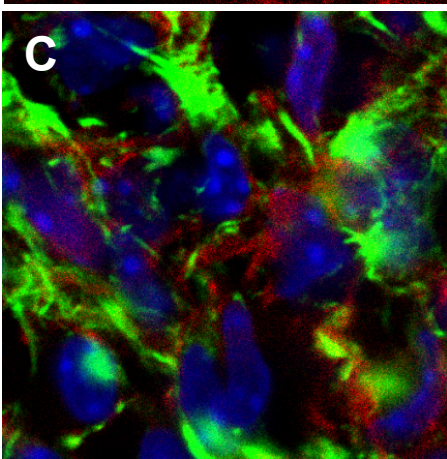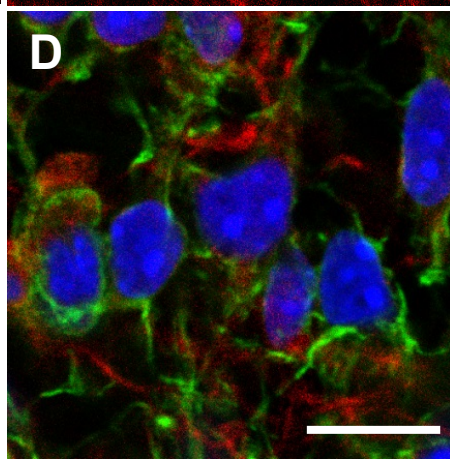

**$\alpha$ -Tubulin, F-actin, Nuclei**

♀

♂

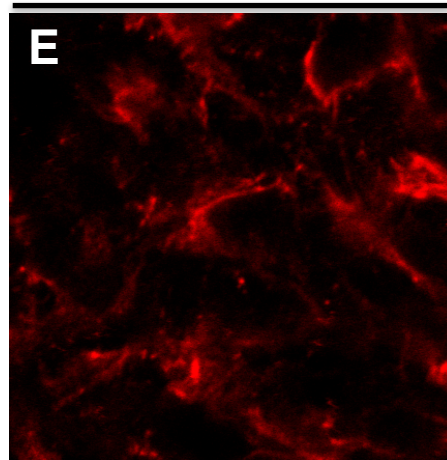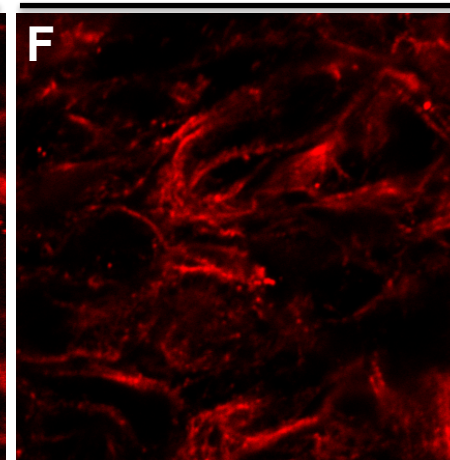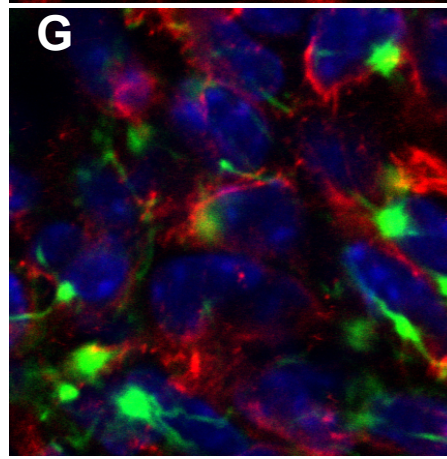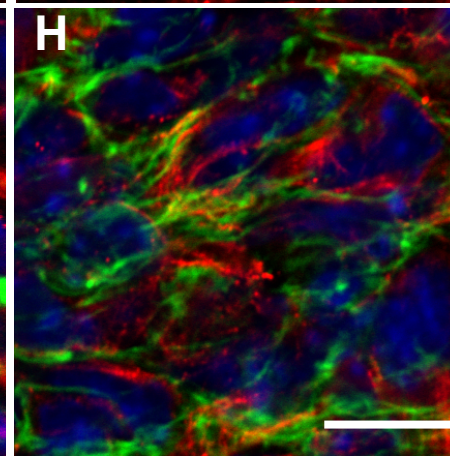

Supplement: Supplementary file 2 [file 1]
